# Supplementary material
Source: PubMed Central journal article supplement (PMC556296)

**A****PRV genome:**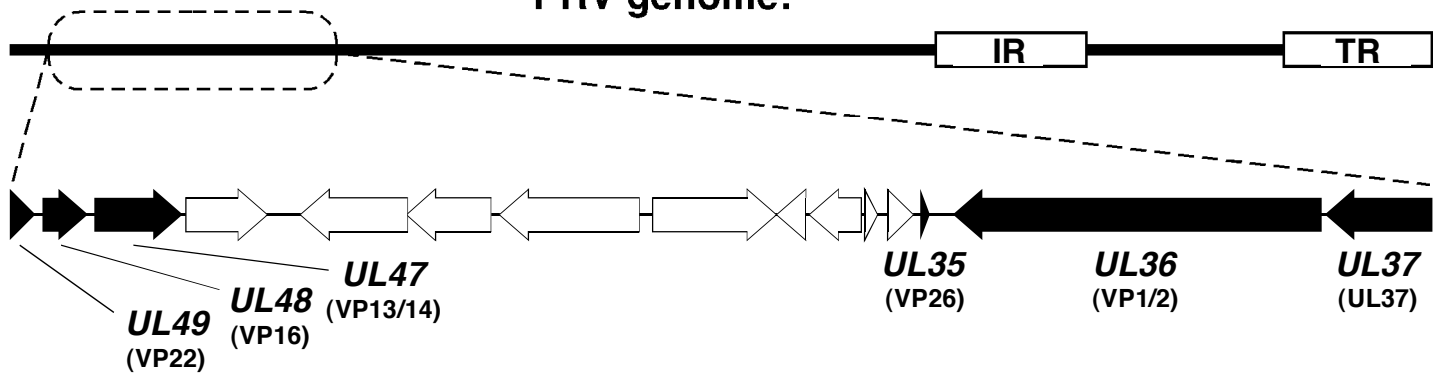**Fusion:****Expected Protein Product:**

mRFP1-VP26

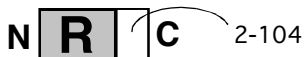

GFP-VP1/2

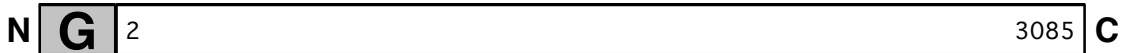

UL37-GFP

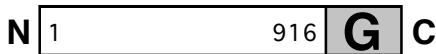

VP16-GFP

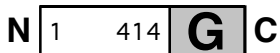

GFP-VP13/14

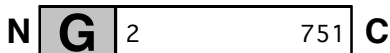

GFP-VP22

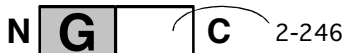**B**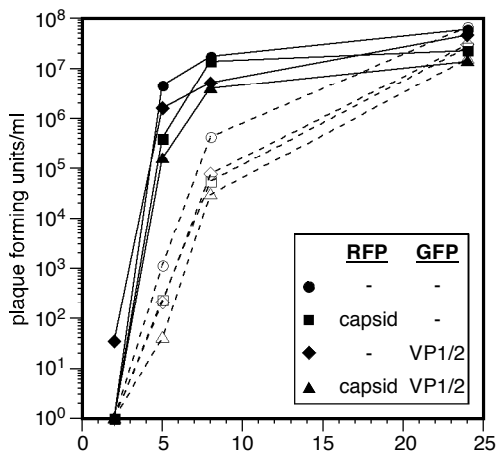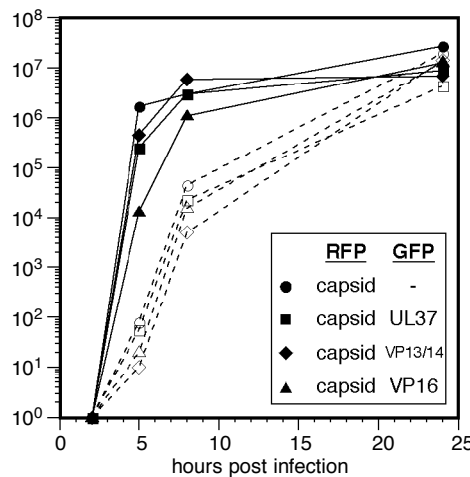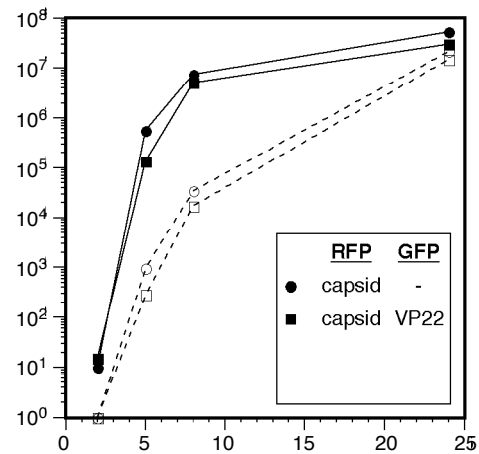

Supplement: pnas_102_16_5832__1.pdf [file pnas_102_16_5832__1.pdf]
